# Supplementary material for: Impact of beta blockers on patients undergoing transcatheter aortic valve replacement: the OCEAN-TAVI registry
Source: PubMed Central journal article supplement (PMC7342827; doi:10.1136/openhrt-2020-001269), 2020-07-07

**Supplementary Table 1. The percentage of missing data for baseline variables.**

| Variables                               | Percentage of missing data (%) |
|-----------------------------------------|--------------------------------|
| BNP                                     | 12.8                           |
| Indexed stroke volume                   | 8.7                            |
| SOV mean diameter                       | 3                              |
| Left ventricular end-systolic diameter  | 0.42                           |
| Left atrial diameter                    | 0.42                           |
| Annulus area                            | 0.15                           |
| Left ventricular end-diastolic diameter | 0.15                           |
| AVA                                     | 0.11                           |
| Mean pressure gradient                  | 0.11                           |
| Euro II score                           | 0.11                           |
| LVEF                                    | 0.07                           |
| Na                                      | 0.04                           |
| Peak velocity                           | 0.04                           |
| AR                                      | 0.04                           |

Abbreviations: AR = aortic regurgitation; AVA = aortic valve area; BNP = brain natriuretic peptide; LVEF = left ventricular ejection fraction; SOV = sinus of Valsalva.

**Supplementary Table 2. Baseline variables after propensity score matching.**

|                                    | Beta-blocker (+)<br>n=779 | Beta-blocker (-)<br>n=779 | P<br>value | SMD    |
|------------------------------------|---------------------------|---------------------------|------------|--------|
| Age, yrs                           | 85(82-88)                 | 85(81-88)                 | 0.57       | 0.029  |
| Male                               | 239(30.7)                 | 232(29.8)                 | 0.7        | 0.020  |
| Body mass index, kg/m <sup>2</sup> | 21.9(19.4-24.4)           | 22.2(19.6-24.4)           | 0.73       | 0.018  |
| Body surface area, m <sup>2</sup>  | 1.40(1.30-1.52)           | 1.40(1.30-1.53)           | 0.96       | 0.003  |
| NYHA 3 or 4                        | 419(53.8)                 | 424(54.4)                 | 0.8        | 0.013  |
| Hypertension                       | 613(78.7)                 | 619(79.5)                 | 0.71       | 0.019  |
| Dyslipidemia                       | 333(42.7)                 | 335(43.0)                 | 0.92       | 0.005  |
| Diabetes mellitus                  | 174(22.3)                 | 192(24.6)                 | 0.28       | 0.055  |
| Chronic kidney disease             | 568(72.9)                 | 562(72.1)                 | 0.73       | 0.017  |
| Previous ischemic stroke           | 72(9.2)                   | 78(10.0)                  | 0.61       | 0.026  |
| Previous hemorrhagic stroke        | 3(0.4)                    | 4(0.5)                    | 0.71       | 0.019  |
| COPD                               | 117(15.0)                 | 135(17.3)                 | 0.22       | 0.063  |
| Peripheral artery disease          | 126(16.2)                 | 124(15.9)                 | 0.89       | 0.007  |
| Coronary artery disease            | 306(39.3)                 | 303(38.9)                 | 0.88       | 0.008  |
| Previous CABG                      | 56(7.2)                   | 63(8.1)                   | 0.5        | 0.034  |
| Atrial fibrillation                | 183(23.5)                 | 179(23.0)                 | 0.81       | 0.012  |
| Permanent pacemaker                | 56(7.2)                   | 60(7.7)                   | 0.7        | 0.034  |
| Liver disease                      | 23(3.0)                   | 23(3.0)                   | 1          | <0.001 |
| Active cancer                      | 39(5.0)                   | 37(4.7)                   | 0.81       | 0.012  |
| CFS                                |                           |                           | 0.92       | 0.021  |
| 1-4                                | 590(75.7)                 | 589(75.6)                 |            |        |
| 5,6                                | 163(20.9)                 | 161(20.7)                 |            |        |
| 7,8                                | 26(3.3)                   | 29(3.7)                   |            |        |
| STS score, %                       | 6.81(4.74-9.96)           | 6.60(4.70-9.91)           | 0.6        | 0.007  |
| Logistic EuroScore, %              | 13.1(8.68-21.2)           | 13.1(8.45-21.4)           | 0.87       | 0.006  |
| Euro II score, %                   | 3.87(2.51-6.03)           | 3.88(2.48-6.38)           | 0.91       | 0.001  |
| Medication                         |                           |                           |            |        |
| RAS inhibitors                     | 431(55.3)                 | 426(54.7)                 | 0.74       | 0.013  |
| Ca blockers                        | 346(44.4)                 | 347(44.5)                 | 0.96       | <0.001 |

|                                                                 |                 |                 |      |        |
|-----------------------------------------------------------------|-----------------|-----------------|------|--------|
| Digoxin                                                         | 22(2.8)         | 16(2.1)         | 0.32 | 0.050  |
| Any diuretic therapy                                            | 486(62.4)       | 496(63.7)       | 0.6  | 0.027  |
| Statin                                                          | 333(42.7)       | 345(44.3)       | 0.54 | 0.031  |
| Laboratory                                                      |                 |                 |      |        |
| Na, mEq/l                                                       | 140(138-142)    | 140(138-142)    | 0.67 | 0.012  |
| Hb, g/dl                                                        | 11.1(10.1-12.3) | 11.2(10.1-12.4) | 0.93 | 0.010  |
| eGFR, ml/min/1.73m <sup>2</sup>                                 | 48.4(36.6-61.0) | 49.0(36.7-61.2) | 0.6  | 0.009  |
| Albumin, g/dl                                                   | 3.80(3.40-4.00) | 3.80(3.50-4.10) | 0.71 | 0.010  |
| Albumin < 3.5g/dl                                               | 196(25.2)       | 192(24.6)       | 0.82 | 0.012  |
| Brain natriuretic peptide, pg/ml                                | 332(153-620)    | 292(123-626)    | 0.14 | 0.023  |
| Brain natriuretic peptide ≥ 400 pg/ml                           | 266(41.5)       | 280(41.9)       | 0.88 | 0.008  |
| Pre-procedural echocardiographic data/Computed tomographic data |                 |                 |      |        |
| Aortic valve are, cm <sup>2</sup>                               | 0.61(0.50-0.73) | 0.62(0.50-0.73) | 0.56 | 0.018  |
| Peak velocity, m/s                                              | 4.47(4.01-5.00) | 4.44(4.00-5.00) | 0.95 | 0.001  |
| Mean pressure gradient, mmHg                                    | 46.0(37.0-58.9) | 46.9(37.0-59.0) | 0.8  | <0.001 |
| LV end-diastolic diameter, mm                                   | 43.5(39.2-48.2) | 44.0(40.0-49.0) | 0.43 | 0.018  |
| LV end-systolic diameter, mm                                    | 28.0(24.5-33.8) | 28.3(25.0-33.5) | 0.61 | 0.012  |
| Left atrial diameter, mm                                        | 42.5(37.4-47.0) | 41.5(38.0-46.0) | 0.29 | 0.002  |
| LVEF, %                                                         | 61.2(52.0-67.0) | 61.0(51.2-67.0) | 0.63 | 0.028  |
| LVEF <50%                                                       | 164(21.1)       | 168(21.6)       | 0.81 | 0.013  |
| Indexed stroke volume, ml/m <sup>2</sup>                        | 43.2(34.4-53.0) | 43.6(34.8-52.4) | 0.89 | 0.013  |
| Indexed stroke volume <35ml/m <sup>2</sup>                      | 174(26.6)       | 165(25.9)       | 0.77 | 0.016  |
| AR ≥moderate                                                    | 80(10.3)        | 92(11.8)        | 0.33 | 0.049  |
| MR ≥moderate                                                    | 89(11.4)        | 98(12.6)        | 0.48 | 0.036  |
| Bicuspid                                                        | 20(2.6)         | 15(1.9)         | 0.39 | 0.043  |
| Annulus area, mm <sup>2</sup>                                   | 390(347-442)    | 391(350-438)    | 0.88 | 0.001  |
| SOV mean diameter, mm                                           | 29.4(27.7-31.4) | 29.4(27.5-31.6) | 0.74 | 0.008  |
| Procedural data                                                 |                 |                 |      |        |
| Transfemoral approach                                           | 636(81.6)       | 636(81.6)       | 1    | <0.001 |
| Elective                                                        | 733(94.1)       | 737(94.6)       | 0.66 | 0.022  |
| Local anesthesia                                                | 183(23.5)       | 179(23.0)       | 0.81 | 0.012  |

Abbreviations: AR = aortic regurgitation; CABG = coronary artery bypass grafting;

COPD = chronic obstructive pulmonary disease; eGFR = estimated glomerular filtration rate; LV = left ventricular; LVEF = left ventricular ejection fraction; MR = mitral regurgitation; NYHA = New York Heart Association; RAS = renin-angiotensin system; SMD = standardized mean difference; SOV = Sinus of Valsalva; STS = Society of Thoracic Surgeons Predicted Risk of Mortality.

### Supplementary Figure 1. Subgroup analysis for cardiovascular mortality in the subset of PPM and PVL.

Forrest plot representing the hazard ratios of cardiovascular mortality in patients with beta-blocker administration compared to patients without, stratified by PPM, PVL.

Abbreviations: PPM = prosthesis-patient mismatch; PVL = paravalvular leak.

#### Supplementary Figure 1

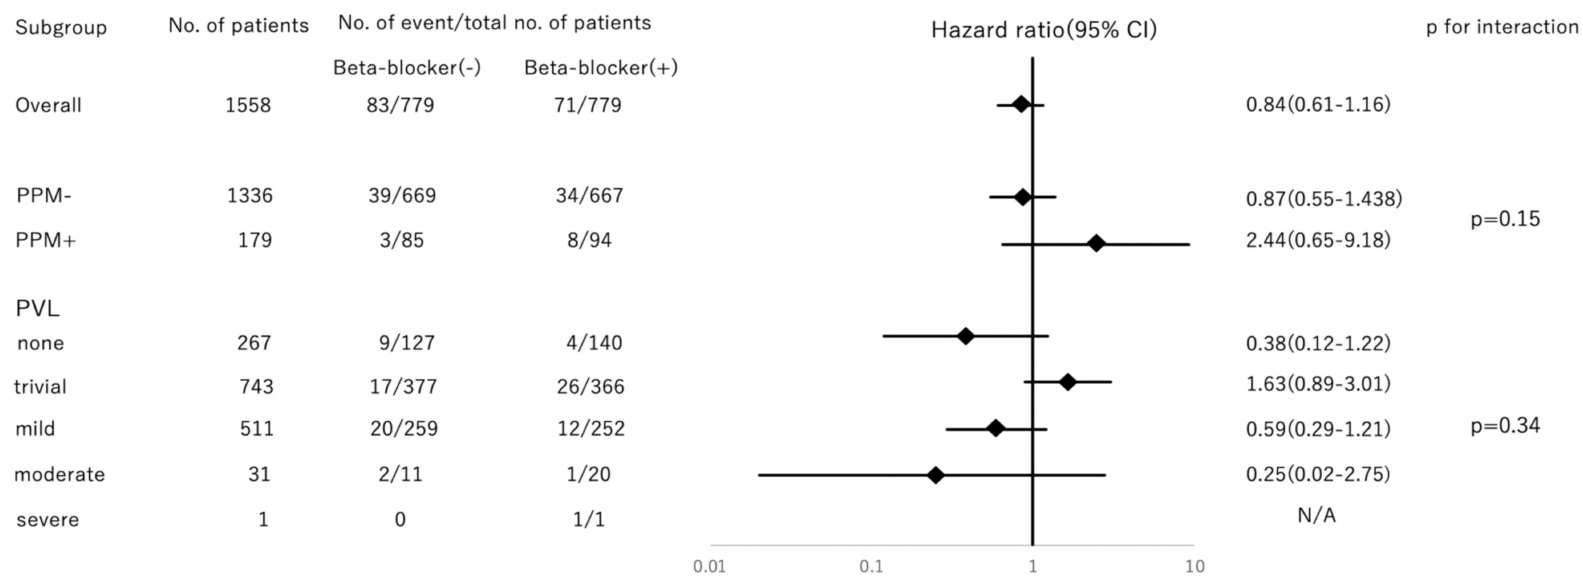

Supplement: openhrt-2020-001269supp001.pdf [file openhrt-2020-001269supp001.pdf]
